## The Xenoestrogen Bisphenol A Inhibits Postembryonic Vertebrate Development by Antagonizing Gene Regulation by Thyroid Hormone

Rachel A. Heimeier, Biswajit Das, Daniel R. Buchholz, and Yun-Bo Shi

Section on Molecular Morphogenesis (R.A.H., B.D., Y.-B.S.), Program on Cell Regulation and Metabolism, National Institute of Child Health and Human Development, National Institutes of Health, Bethesda, Maryland 20892; and Department of Biological Sciences (D.R.B.), University of Cincinnati, Cincinnati, Ohio 45221-0006

Bisphenol A (BPA), a chemical widely used to manufacture plastics, is estrogenic and capable of disrupting sex differentiation. However, recent *in vitro* studies have shown that BPA can also antagonize  $T_3$  activation of the  $T_3$  receptor. The difficulty in studying uterus-enclosed mammalian embryos has hampered the analysis on the direct effects of BPA during vertebrate development. This study proposed to identify critical  $T_3$  pathways that may be disrupted by BPA based on molecular analysis *in vivo*. Because amphibian metamorphosis requires  $T_3$  and encompasses the postembryonic period in mammals when  $T_3$  action is most critical, we used this unique model for studying the effect of BPA on  $T_3$ -dependent vertebrate development at both the morphological and molecular levels. After 4 d of exposure, BPA inhibited  $T_3$ -induced intestinal remodeling in premetamorphic *Xenopus laevis* tadpoles. Importantly, microarray analysis revealed that BPA antagonized the regulation of most  $T_3$ -response genes, thereby explaining the inhibitory effect of BPA on metamorphosis. Surprisingly, most of the genes affected by BPA in the presence of  $T_3$  were  $T_3$ -response genes, suggesting that BPA predominantly affected  $T_3$ -signaling pathways during metamorphosis. Our finding that this endocrine disruptor, well known for its estrogenic activity *in vitro*, functions to inhibit  $T_3$  pathways to affect vertebrate development *in vivo* and thus not only provides a mechanism for the likely deleterious effects of BPA on human development but also demonstrates the importance of studying endocrine disruption in a developmental context *in vivo*. (*Endocrinology* 150: 2964–2973, 2009)

**E**ndocrine disruption by environmental contaminants poses a great concern for global ecology and human health. Endocrine disrupting compounds (EDCs) have been defined as exogenous substances that alter function(s) of the endocrine system and consequently cause adverse health effects in an intact organism, or its progeny, or (sub)populations (1–3). Some EDCs act as antiestrogenic and antiandrogenic agents to affect reproductive function and sexual development (4), suggesting that EDCs are responsible for the increased appearance of reproductive health problems in both human and wildlife. In humans, the trend for increased breast and testicular cancers, reduced sperm counts, and early puberty has been attributed to increased exposure to EDCs (5–7). In wildlife, decreased species populations and increased animal malformations, including feminization and

hermaphroditism, have been reported worldwide (8–11). There is also increasing concern that EDCs may affect other endocrine systems, such as the  $T_3$  system.

$T_3$  plays a central role in vertebrate development, growth, and metabolism (12–18). The effects of EDCs on  $T_3$  signaling will undoubtedly pose a threat to human and wildlife health (19–22). Keyed by the discovery of nuclear  $T_3$  receptors (TRs) that function as transcription factors, recent advances have been made in examining the mechanisms of  $T_3$  action at the molecular level (12, 13, 15, 23–31). Concurrently, studies have also revealed a broad array of EDCs that can bind to TR and affect  $T_3$ -regulated gene expression *in vitro* (32). However, the lack of a suitable *in vivo* model to study EDCs' effects on TR function in vertebrate development impedes our understanding on whether and how

ISSN Print 0013-7227 ISSN Online 1945-7170

Printed in U.S.A.

Copyright © 2009 by The Endocrine Society

doi: 10.1210/en.2008-1503 Received October 28, 2008. Accepted February 11, 2009.

First Published Online February 19, 2009

Abbreviations: BMP, Bone morphogenetic protein; BPA, bisphenol A; DMSO, dimethyl sulfoxide; EDC, endocrine disrupting compound; EF-1 $\alpha$ , elongation factor-1 $\alpha$ ; ER, estrogen receptor; MMP, matrix metalloproteinase; rpl8, ribosomal protein L8; qRT-PCR, quantitative RT-PCR; RXR, retinoid X receptor; ST3, stromelysin-3; TH/bZIP,  $T_3$ -responsive basic leucine zipper transcription factor; TIMP, tissue inhibitor of metalloproteinase; TR,  $T_3$  receptor.

persistent exposure to these bioaccumulative compounds affects human health.

One such compound is bisphenol A (BPA), an established EDC of the reproductive system. BPA is used in the production of plastics and has widespread applicability, making its manufacturing and processing an important economical factor as well as a source of BPA release into the environment (33–40). BPA studies have primarily focused on its estrogenic activity (4, 41). Recently based on extensive review of the existing data, the National Toxicology Program of the National Institutes of Health raised concerns for neural and behavioral effects of BPA in fetuses, infants, and children at the currently allowed human exposures ([www.niehs.nih.gov/news/media/questions/sya-bpa.cfm#2](http://www.niehs.nih.gov/news/media/questions/sya-bpa.cfm#2)). The concerns from this reviewing panel were primarily focused on the estrogenic effects of BPA, even though the role of estrogens on mammalian neural development is unclear. On the other hand, neural and behavioral development is dependent on  $T_3$ , raising the possibility that the developmental effects of BPA in humans may be manifested through the  $T_3$  pathway. Given the possible cross talks between the  $T_3$  and estrogenic pathways (42, 43), BPA may indirectly affect  $T_3$  signaling by influencing estrogenic pathways. On the other hand, *in vitro* studies have shown that BPA can bind to and antagonize  $T_3$  activation of TR (44), and a study using cultured mouse oligodendrocyte precursor cells found that BPA inhibited  $T_3$ -induced differentiation (45). In addition, a study with rats showed that BPA exposure during development produced an endocrine profile similar to that observed in patients with  $T_3$  resistance syndrome (46).

The ability of BPA to bind to both estrogen and thyroid receptors to elicit disruption makes it very difficult to study the actions of BPA during mammalian development. Suitable alternative *in vivo* models are urgently needed to evaluate the effects of BPA on  $T_3$  function during development. Amphibian metamorphosis represents an attractive model due to its absolute dependence on  $T_3$  but not estrogens (14, 15), although sex steroids can alter larval development in amphibians (47–49). Recent studies have shown that BPA blocks metamorphosis and affects  $T_3$ -signaling in amphibians (50–53). In addition, it has been shown that BPA suppresses TRH-induced release of thyroid-stimulating hormone and prolactin in adult bullfrog pituitary cells, suggesting that BPA can disrupt the hypothalamic-pituitary-thyroid axis (54). On the other hand, BPA has also been shown to induce feminization in *Xenopus laevis* tadpoles (55, 56), although a different study failed to produce this effect (57).

Here we propose the use of *X. laevis* metamorphosis as a model to investigate whether and how BPA affects  $T_3$ -dependent vertebrate development. To date, little molecular analyses have been carried out to determine how BPA affects either metamorphosis or other postembryonic developmental processes in vertebrates. Because changes in gene expression often precede morphological changes, we aimed to use microarray technology to determine the signaling transduction pathways underlying any metamorphic effects of BPA. We chose the intestine as the model system because it represents an organ that persists throughout metamorphosis but undergoes extensive but well-characterized remodeling (58, 59). It is important to note that gene regulation by  $T_3$  through TR is not only necessary but also sufficient for

intestinal remodeling and other metamorphic processes (60). Furthermore, because the metamorphic process can easily be manipulated by controlling the availability of  $T_3$  via the tadpole rearing water, the influence of maternal hormones and the difficulty to manipulate the uterus-enclosed mammalian embryo are avoided.

Our molecular analysis indicates that BPA, even though mainly known as an estrogenic compound, predominantly disrupts  $T_3$ -signaling pathways during metamorphosis, resulting in delayed metamorphosis. Our results suggest that similar adverse effects of BPA on human development by disrupting  $T_3$  pathways is likely and argue for the importance of studying endocrine disruption in the developmental context *in vivo*. They also highlight the power of combining morphological and molecular analyses of amphibian metamorphosis for studying endocrine disruption in development.

## Materials and Methods

### Animals

Tadpoles of *X. laevis* used in this study were purchased from NASCO (Fort Atkinson, WI). The animals were exposed to a 12-h light, 12-h dark photoperiod (lights on at 0700 h) and were fed spirulina, a fresh water alga, at 1000 h. Animal studies were approved by National Institute of Child Health and Human Development Animal Use and Care Committee.

### Chemicals

$T_3$ , BPA, and dimethyl sulfoxide (DMSO) were purchased from Sigma (St. Louis, MO). All exposure treatments were conducted in 0.1% DMSO solution.

### Oocyte injections and luciferase assays

Microinjection experiments were performed as described (61, 62). Briefly, a reporter construct, TRE-Luc, harboring the  $T_3$ -dependent *X. laevis* TRBA promoter driving the firefly luciferase reporter was microinjected (0.33 ng/oocyte) into the nuclei of *X. laevis* oocytes together with a plasmid harboring the control *Renilla* luciferase reporter. *In vitro*-transcribed mRNAs encoding TR $\beta$  and retinoid X receptor (RXR)- $\alpha$  were coinjected (1.15 ng/oocyte for TR $\beta$  and RXR $\alpha$ ) into the cytoplasm. After overnight incubation in the presence or absence of BPA and/or  $T_3$ , oocytes were assayed for luciferase activity.

### Animal exposures to BPA

#### Experiment 1

BPA exposures were performed in a static-renewal system based on previous studies (51, 52, 56). Before exposure, test animals were acclimatized to laboratory conditions at 23–24 C for 24 h. During the acclimatization and exposure periods, the animals were not fed to eliminate dietary influence on metamorphosis progression (note that tadpoles undergoing metamorphosis or  $T_3$  treatment do not feed) (15). Ten premetamorphic *X. laevis* tadpoles (stage 54) were randomly transferred into 1-liter tanks containing dechlorinated water. Animals were subsequently exposed to conditions with 2 nM  $T_3$ , 0.1 or 10  $\mu$ M BPA, or the combination of 2 nM  $T_3$  and 0.1 or 10  $\mu$ M BPA; the corresponding control group contained DMSO vehicle. The two concentrations of BPA used in this study are known to interfere with  $T_3$  action *in vitro* (44) and physiologically relevant for human infants (0–12 months) (within 24 h, estimated infant intake is 13  $\mu$ g/kg body weight or 60 nM, calculated based on the assumption that: 1) BPA uptake is equivalent to BPA metabolized and excreted by the body within the 24 h and 2) BPA is equally distributed

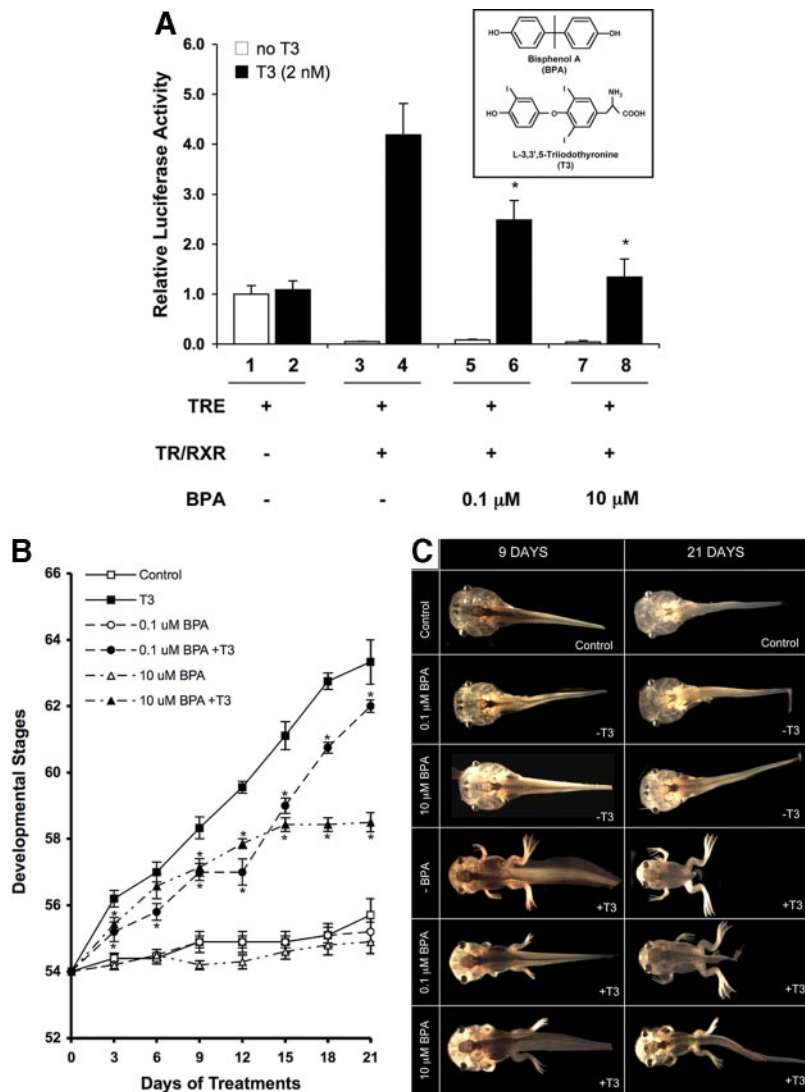

**FIG. 1.** BPA inhibits TR-mediated transcription and T<sub>3</sub>-induced metamorphosis. **A**, The mRNAs for TR/RXR (1.15 ng/oocyte) were injected into the cytoplasm of 20 oocytes as indicated. After 4 h of incubation, the TRE-Luc reporter vector (TRE) together with the control *Renilla* luciferase plasmid were coinjected into the nucleus of the oocytes. The oocytes were incubated overnight with or without T<sub>3</sub> (2 nM) and indicated amounts of BPA. After incubation, the oocytes were lysed and subjected to dual-luciferase assays. The relative activity of the reporter vs. that of the control was plotted with the basal luciferase activity set to 1 (lane 1, in the absence of T<sub>3</sub>). The bars represent the means  $\pm$  SE of at least two independent experiments performed in quadruplicates. \*,  $P \leq 0.05$  vs. lane 4 in the presence of T<sub>3</sub>. **Insert**, Structural comparison of BPA (upper panel) and T<sub>3</sub> (lower panel). **B**, Dose- and time-dependent inhibition of T<sub>3</sub>-induced *X. laevis* metamorphosis by BPA. The average developmental stages of the animals were plotted every third day, and each point represents the mean  $\pm$  SE. An asterisk indicates significant differences in the development stages between T<sub>3</sub> and T<sub>3</sub>+BPA treatment groups ( $P \leq 0.05$ ). Note only one time point for one treatment group did not show a statistically significant difference in development progression compared with T<sub>3</sub>-treated animals (d 6; 10 μM BPA+T<sub>3</sub>). There was no significant difference in development between control (DMSO vehicle control) and BPA-only-treated animals. **C**, Representative profile of tadpoles housed in water (DMSO vehicle control), T<sub>3</sub> (2 nM), BPA (0.1 or 10 μM), or combinations of BPA (0.1 or 10 μM) and T<sub>3</sub> (2 nM). Groups of 10 tadpoles at stage 54 (d 0) were used for each treatment. Tadpoles representing the typical stage in each treatment were photographed and the gross morphology observed for 9- and 21-d-treated tadpoles are presented here.

throughout the body with a density of 1; the Environmental Protection Agency has set safe level of exposure to 50 μg/kg per day in the United States) ([www.niehs.nih.gov/news/media/questions/sya-bpa.cfm#2](http://www.niehs.nih.gov/news/media/questions/sya-bpa.cfm#2)). Exposure treatment was conducted for 21 d at 23–24 C under 12-h light, 12-h dark cycle conditions. Water changes and chemical replacement were performed every other day. The developmental stages of the animals from each group were examined every 3 d. During the experiments, tadpoles were anesthetized in 0.02% 3-aminobenzoic acid ethyl ester (Sigma) and photographed under a stereomicroscope (Olym-

pus, Tokyo, Japan) for gross morphology analysis. Each treatment was repeated at least three times (10 tadpoles/replicate) using tadpoles derived from different sets of adults.

## Experiment 2

To study the effect of BPA on T<sub>3</sub>-induced gene expression during development, a short-term exposure experiment was performed. Acclimatization and exposure conditions were performed as described above. Groups of 10 premetamorphic *X. laevis* tadpoles (stage 54) were randomly placed into four tanks with 1 liter of dechlorinated water. Animals were subsequently exposed to conditions with the DMSO vehicle, 2 nM T<sub>3</sub>, 10 μM BPA, or the combination of 2 nM T<sub>3</sub> and 10 μM BPA. Exposure treatment was conducted for 4 d at 23–24 C under 12-h light, 12-h dark cycle conditions. Water changes and chemical replacement were performed after 2 d of exposure. Each treatment was replicated three times (10 tadpoles/replicate).

## RNA isolation and microarray analysis

At the end of the 4-d treatment period, the intestine from 10 tadpoles were isolated and pooled for each of the three biological replicates per treatment. RNA was isolated and subjected to cDNA array (slides AMADID 013665; Agilent, Santa Clara, CA) analysis by using a two-color reference design system as described (63, 64) (also see supplemental Fig. S1, published as supplemental data on The Endocrine Society's Journals Online web site at <http://endo.endojournals.org>). To identify significantly regulated genes, we performed ANOVA across all treatments and used a false discovery rate of 10% or less for multivariate correction (65–67).

## Real-time PCR quantification

This was performed as described (63) using the three RNA samples as in the microarray as well as another from other tadpoles treated under the same conditions to confirm the microarray data. Real-time quantitative RT-PCR (qRT-PCR) was carried out using FAM-labeled Taqman probes for some genes (supplemental Table S1) with cDNA standards made from whole-body total RNA from tadpoles at stages 50–66. The expression level of each gene was normalized to that of the control gene, ribosomal protein L8 (rpl8). Additional genes were analyzed with SYBR Green I dye (supplemental Table S2), and the expression level of each gene was normalized to that of the control gene, elongation factor-1α (EF-1α). In a preliminary experiment, we observed that the levels of rpl8 and EF1α were not different in intestine samples from control and chemically treated tadpoles. For data analysis, intergroup comparisons were performed with ANOVA followed by Fisher's protected least significant difference test;  $P \leq 0.05$  was considered to be statistically significant.

## Histology

The intestines were dissected, flushed and fixed in Bouin's fluid for 24 h, rinsed in 0.6× PBS and stored in 70% ethanol. Paraffin embedded



5- $\mu\text{m}$ -thick sections were serially collected on glass slides and stained with hematoxylin-eosin.

## Results

### BPA suppresses $T_3$ -induced transcription

BPA is known to bind to and antagonize  $T_3$ -dependent activation of mammalian TR (44). To investigate whether BPA influences *X. laevis* TR *in vivo*, we analyzed the effect of BPA on TR-dependent luciferase reporter (TRE-Luc) expression in the reconstituted frog oocyte system, a model to study  $T_3$ -mediated transcription in the context of chromatin (61). In the absence of  $T_3$ , overexpressed TR $\beta$  and RXR $\alpha$  repressed the promoter, as reported (62, 68), whereas in the presence of  $T_3$ , the promoter was activated (Fig. 1A). BPA inhibited the transcriptional activation of the promoter by  $T_3$  but had little effect on the promoter in the absence of  $T_3$  (Fig. 1A). In the absence of TR $\beta$  and RXR $\alpha$ , BPA had no significant effect on the promoter activity (data not shown). Thus, BPA may function as an inhibitor of gene activation by  $T_3$  to affect *X. laevis* development.

### BPA inhibits $T_3$ -induced metamorphosis

To study the effect of BPA on development, premetamorphic tadpoles were treated with BPA,  $T_3$ , or a combination of both (Fig. 1, B and C). Gross morphology was monitored to determine the developmental stages every 3 d for a 21-d study period. Treatments of premetamorphic tadpoles with  $T_3$  resulted in well-established morphological changes (15), and the inhibition of these changes by BPA could be observed as early as 3 d (Fig. 1B and supplemental Fig. S2). At the end of the 21-d study,  $T_3$ -treated animals had metamorphosed to stage 64, whereas the control animals reached only stage 56 (Fig. 1C). No significant stage difference was observed between control (DMSO) and BPA-treated animals. The tadpoles that were exposed to combined  $T_3$  and BPA ( $T_3$ +BPA) were significantly delayed in metamorphosis compared with the  $T_3$ -treated animals, and this effect of BPA was dose dependent (Fig. 1B).

To study the effect of BPA on the remodeling of visceral organs during development, we analyzed the intestine, a model organ that has been well characterized morphologically and molecularly (58, 59, 63, 69). After 4 d of treatment, control intestinal cross-sections had thin muscle layers around the exterior, a thin layer of connective tissue, and a simple inner epithelium with a single in-folding, the typhlosole, which contains the majority of connective tissue in the larval intestine (Fig. 2A). Little morphological change occurred after 4 d of BPA treatment, and these intestinal samples were comparable with those of the untreated samples (Fig. 2B). In the presence of  $T_3$ , the overall length of the intestine shortened (data not shown). Histological examination of the  $T_3$ -treated intestine revealed the well-documented tissue remodeling responses to  $T_3$ , such as the increased thickness in muscle and connective tissue layers (Fig. 2C) (59). In the presence of  $T_3$ +BPA, very little morphological change occurred (Fig. 2D).

### BPA inhibits $T_3$ -induced gene expression

To investigate whether BPA inhibits the expression of  $T_3$ -response genes, we first determined whether known  $T_3$  response

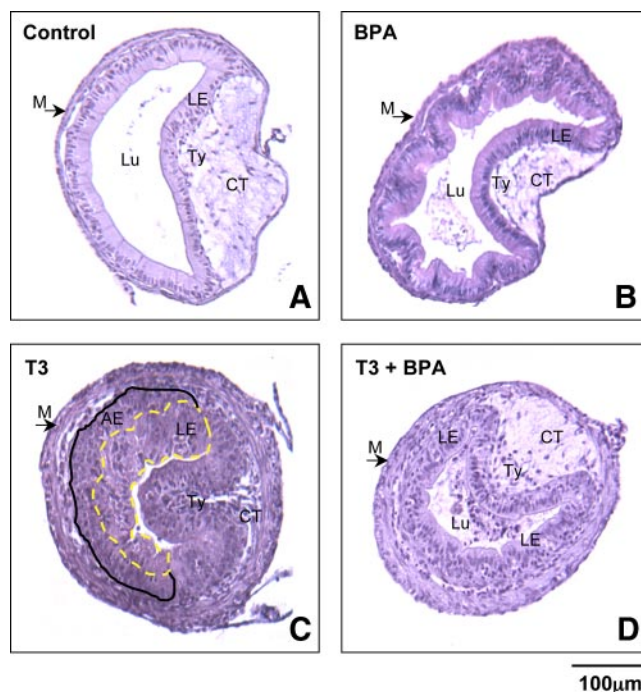

**FIG. 2.** In the presence of BPA, intestinal remodeling is delayed during  $T_3$ -induced metamorphosis as early as 4 d after treatment. Tadpoles of the same size and at the same stage (stage 54) were treated with  $T_3$  to initiate the metamorphic process. Four days later, the intestines were isolated, fixed, and the sections stained with hematoxylin-eosin. Representative control (A), BPA- (B),  $T_3$ - (C), and  $T_3$ +BPA (D)-treated tadpoles are shown. Note that the control, BPA, and  $T_3$ +BPA intestine remained largely typical of tadpole intestine, as seen by the presence of a thin muscle layer, little connective tissue, and little or no adult intestinal precursor cells. Histology of  $T_3$ -treated intestines revealed increased muscle layer thickness, proliferation of connective tissue, and the appearance of adult epithelial cells (the larval epithelial cells are surrounded by a yellow dashed ring, whereas the appearance of adult epithelial cells are represented between a black solid and the yellow dashed line). This experiment was repeated four times with similar results. Scale bar, 100  $\mu\text{m}$ . AE, Adult epithelium; CT, connective tissue; LE, larval epithelium; Lu, lumen; M, muscle; Ty, typhlosole.

genes were affected by BPA. Total RNA was isolated from the intestine and qRT-PCR was performed. The expression of three early, direct  $T_3$  response genes, TR $\beta$ , stromelysin-3 (ST3), and  $T_3$ -responsive basic leucine zipper transcription factor (TH/bZIP) was significantly higher in the  $T_3$ -treated tadpoles than the control or BPA-treated counterparts after 4 d (Fig. 3A). The expression level of ST3 and TH/bZIP were significantly reduced in the combined  $T_3$ +BPA group compared with the  $T_3$ -only group, although BPA had little effect on the  $T_3$  induction of TR $\beta$ . The expression of two late, likely indirect  $T_3$  response genes, matrix metalloproteinase (MMP)-2 and the tissue inhibitor of metalloproteinase (TIMP)-2, were also significantly reduced in the  $T_3$ +BPA-treated animals compared with the  $T_3$ -treated animals. The expression of the third late response gene, bone morphogenetic protein (BMP)-4, in the  $T_3$ +BPA-treated group was not significantly different from either the  $T_3$ -treated or control group, although there was significant difference between the control and  $T_3$ -treated groups (Fig. 3B). (Note that because different  $T_3$  response genes have different  $T_3$  regulation kinetics, it is possible that TR $\beta$  and BMP4 are affected by BPA at different time points). These results suggest that BPA inhibits the expression of known  $T_3$ -response genes.

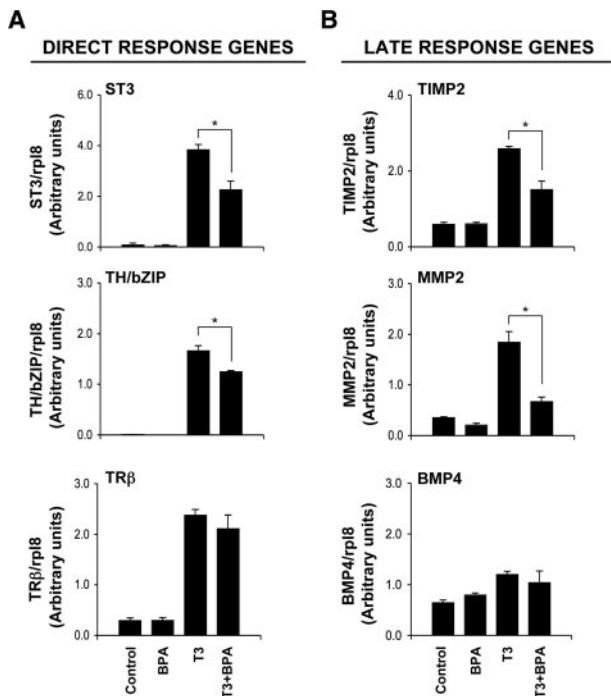

**FIG. 3.** The relative expression of known T<sub>3</sub>-inducible genes was reduced in the intestine of animals exposed to BPA. The cDNA was generated from total RNA of tadpoles treated as in Fig. 2 and subjected to qRT-PCR. A, Direct T<sub>3</sub>-response genes ST3, TH/bZIP, and TRβ were examined. B, Late T<sub>3</sub>-response genes MMP-2, TIMP2, and BMP4 were examined. The results are expressed as fold induction of the transcript with respect to the control gene, rpl8. The expected increase in relative levels of transcript with respect to rpl8 was observed in the presence of T<sub>3</sub>. For graphical presentation, results were expressed as fold induction as compared with the DMSO vehicle control. Data are shown as means ± SE (n = 3; pooled samples of 10 intestines for each treatment). In the animals treated with T<sub>3</sub>+BPA, the expression levels of ST3, TH/bZIP, MMP-2, and TIMP2 genes were significantly reduced in the intestine. An asterisk indicates significant differences in mRNA expression levels between T<sub>3</sub> and T<sub>3</sub>+BPA treatment groups ( $P \leq 0.05$ ).

### BPA predominantly affects T<sub>3</sub>-signaling pathways in the intestine

To investigate whether BPA indeed inhibits T<sub>3</sub>-induced metamorphosis by blocking the T<sub>3</sub>-signaling pathways, we performed a genome-wide analysis by profiling gene expression in the intestine with a 60-mer oligonucleotide microarray (cDNA array). Because the phenotypes of BPA exposed tadpoles were similar with BPA at either concentration and reproducible, we performed the subsequent molecular analysis at the higher dose to detect the relatively small changes in gene expression caused by BPA. Total RNA was isolated from the intestine of tadpoles treated for 4 d with control solution (DMSO), BPA (10 μM), T<sub>3</sub> (2 nM), and combined T<sub>3</sub> (2 nM) + BPA (10 μM). For cDNA array analysis, we used a two-color labeling system, with Cy3-labeled experimental sample and Cy5-labeled universal control made of RNA isolated from whole animals of different metamorphic stages as the internal reference (supplemental Fig. S1). For each treatment group, three biological replicates, each consisting of 10 pooled intestine samples, were used. Quality control of the data were performed as previously described (63).

To identify significantly regulated genes, we performed ANOVA across all treatment groups with statistical significance of 10% false discovery rate with the fold change cutoff value set at 1.1 or greater for the regulated genes. Note that a relatively low

cutoff was chosen because the effect of BPA on gene regulation was expectedly small. Because of the reproducibility of the cDNA array and the use of three biological replicates/treatment, it was possible to obtain statistically significant changes at this fold change cutoff. Of the 21,654 genes represented on the microarray, we found 1874 significantly regulated genes. There were 1051 and 728 genes significantly up- and down-regulated, respectively, in the T<sub>3</sub>-treated intestines compared with the controls (Fig. 4, A and B, respectively; supplemental Tables 3 and S4, respectively). Many of the genes that were differentially regulated by T<sub>3</sub> after 4 d were similar to those reported previously (63) (data not shown). The gene regulation profiles of the T<sub>3</sub> and combined T<sub>3</sub>+BPA samples were remarkably similar. The highest number of shared regulated genes was recorded between these two groups, in which 716 and 567 genes were exclusively shared up- and down-regulated, respectively (Fig. 4, A and B, respectively). There were 293 up-regulated genes common to all three treatments (BPA, T<sub>3</sub>, and combined T<sub>3</sub>+BPA) and 120 common down-regulated genes. Of the total number of regulated genes on the array, 211 of these genes were exclusively up-regulated and 168 of these genes were exclusively down-regulated in the BPA-only-treated group (supplemental Tables S5 and S6, respectively), suggesting that BPA can affect genes independent of the T<sub>3</sub> pathway during development.

Given the inhibitory effects of BPA on all aspects of T<sub>3</sub>-induced metamorphosis, it seemed surprising that most of the up- or down-regulated genes in the T<sub>3</sub> group were also similarly affected in the T<sub>3</sub>+BPA-treated group in comparison with the controls (Fig. 4). However, as shown above, BPA only partially blocked the regulation of established T<sub>3</sub>-response genes (Fig. 3). Thus, it is likely that BPA may globally attenuate the magnitude of T<sub>3</sub>-regulation to inhibit metamorphosis. To test this, we analyzed the microarray data and compared the expression levels of individual genes between T<sub>3</sub>- and T<sub>3</sub>+BPA-treated groups to identify T<sub>3</sub>-dependent genes whose expression was affected by the presence of BPA. Of the 21,654 genes on the microarray, 342 genes had decreased expression in the presence of BPA in the T<sub>3</sub>-treated intestines compared with T<sub>3</sub>-only-treated animals (supplemental Table S7). Among these BPA down-regulated transcripts, most (62%) of these genes were identified as T<sub>3</sub>-induced genes (compared with vehicle treated control), revealing an attenuation of T<sub>3</sub>-dependent gene activation by BPA (Fig. 5A). The remaining down-regulated genes in the T<sub>3</sub>+BPA treatment group relative to T<sub>3</sub> alone could be subdivided into genes known to be down-regulated by T<sub>3</sub> (when compared with vehicle treated control) whose expression was now, in the presence of BPA, further repressed (22%) and genes whose expression did not have any known T<sub>3</sub> dependency (16%). To validate the repression of the T<sub>3</sub>-induced genes by BPA, 10 of the genes were analyzed by qRT-PCR across all treatment groups with total RNA isolated independently from that used in the microarray. The BPA regulation of all selected genes was confirmed by qRT-PCR, of which nine are represented here (Fig. 5B).

In the presence of BPA+T<sub>3</sub>, 159 genes had enhanced expression when compared with T<sub>3</sub> treatment alone (supplemental Table S8). Of these genes, 48% were down-regulated in the presence of T<sub>3</sub> (when compared with vehicle treated control),

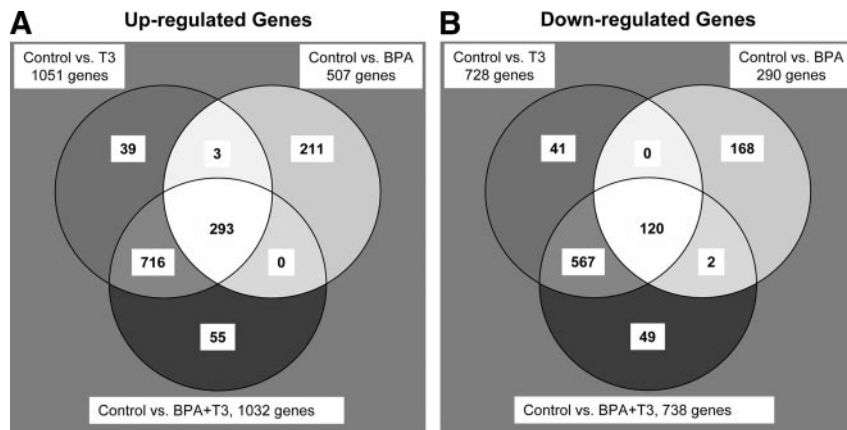

**FIG. 4.** Venn diagrams showing the number of up- and down-regulated genes for the treatment groups in comparison with that of the control group. A, A total of 1317 genes were up-regulated in response to treatment with the exogenous compounds,  $T_3$  and/or BPA. There were 293 genes commonly up-regulated in all three treatment groups, and 39, 211, and 55 genes were up-regulated only in treatment groups for  $T_3$ , BPA, or  $T_3$ +BPA, respectively. There were 716 genes commonly up-regulated between  $T_3$  and  $T_3$ +BPA groups, three genes between  $T_3$ - and BPA-only groups, and none between BPA and  $T_3$ +BPA groups. B, A total number of 947 genes were down-regulated in response to treatment with the exogenous compounds,  $T_3$  and/or BPA. There were 120 genes commonly down-regulated in all three treatment groups, and 41, 168, and 49 genes were down-regulated only in treatment groups for  $T_3$ , BPA, or  $T_3$ +BPA, respectively. There were 567 genes commonly down-regulated between  $T_3$  and  $T_3$ +BPA groups, no genes between  $T_3$ - and BPA-only groups, and two genes between BPA and  $T_3$ +BPA groups.

revealing an abrogation of  $T_3$ -dependent gene repression by BPA (Fig. 5C). The remaining genes showing enhanced expression in the  $T_3$ +BPA treatment group relative to  $T_3$  alone, included genes known to be up-regulated by  $T_3$  (when compared with vehicle treated control), which now in the presence of BPA were further enhanced (47%), and genes that did not have any known  $T_3$  dependency (5%). Again, qRT-PCR was used to confirm the regulation of  $T_3$ -response genes by BPA as found by the cDNA array. Here four genes were analyzed by qRT-PCR, and their regulation by BPA was confirmed (Fig. 5D).

The above qRT-PCR results thus confirmed the findings from microarray analysis. More importantly, the microarray results demonstrate that BPA functions mainly by inhibiting  $T_3$ -pathways because most of the BPA-affected genes were  $T_3$ -response genes whose regulation by  $T_3$  was attenuated by BPA.

### The antimetamorphic effects of BPA are associated with inhibition of $T_3$ -dependent gene regulation programs

Whereas the major effects of BPA is the inhibition of  $T_3$  signaling pathways, it is possible that the antimetamorphic effects of BPA may be due to effects of BPA on genes independent of  $T_3$ . Thus, we analyzed the genes that were regulated by  $T_3$  after 4 d of treatment. Of the total number of  $T_3$  up-regulated genes (1051), 33% of these genes were down-regulated by BPA (data not shown). Conversely, of the total number of  $T_3$  down-regulated genes (728), 36% of these genes were up-regulated by BPA (data not shown). Interestingly, when we ranked the  $T_3$ -induced genes from most dramatically regulated to the least regulated, we found that the majority of the 50 most dramatically  $T_3$  up-regulated genes ( $\geq 2.5$ -fold induction by  $T_3$ ) were inhibited by BPA (Fig. 6A). Similarly, the  $T_3$  repression of most of the 50 dramatically  $T_3$  down-regulated genes ( $\geq 1.9$ -fold repression by  $T_3$ ) was reduced/abrogated by BPA (Fig. 6B). Moreover, by incorporating microarray data of  $T_3$ -responsive genes in the tail, hindlimb,

and brain (64), we observed that the vast majority of these dramatically regulated genes that are also induced by  $T_3$  in other organs were inhibited by BPA in the presence of  $T_3$  (Fig. 6A). Conversely, of the 12 genes that are known to be down-regulated by  $T_3$  in multiple organs,  $T_3$  repression of seven genes was abrogated by BPA (Fig. 6B). These results suggest that BPA inhibits most of the genes highly up-regulated by  $T_3$ . The reason for our failure to detect BPA inhibition of genes less significantly up-regulated by  $T_3$  was most likely because their regulation by  $T_3$  was approaching the lower limit of the cDNA array analysis, thus making the regulation by BPA fall below the detection limit. Because gene regulation by  $T_3$ -bound TR is both necessary and sufficient for amphibian metamorphosis, these results suggest that BPA inhibits metamorphosis because it blocks most of the  $T_3$ -signaling pathways.

## Discussion

In the present study, we characterized for the first time global gene expression changes associated with BPA exposure by using amphibian metamorphosis as our experimental model. This model was favorable over mammalian models because the *in vivo* screening process was quicker and the influence of maternal hormones and the difficulty in manipulating the uterus-enclosed embryo were eliminated. Whereas BPA was able to regulate many genes in premetamorphic tadpoles in the absence of  $T_3$ , there was no detectible morphologic phenotype, making it difficult to determine the significance. We thus focused our analysis on the effect of BPA during metamorphosis, *i.e.* when  $T_3$  is also present. Our microarray analysis revealed novel findings. First, BPA inhibited the regulation of most  $T_3$ -dependent responsive genes, which presumably underlie the inhibition of metamorphosis by BPA, which was not evident from limited analyses in earlier studies. Second and more importantly, BPA predominantly affected  $T_3$ -signaling pathways during metamorphosis, although the influence of BPA on estrogen-signaling pathways in metamorphosing tadpoles cannot be dismissed. Our findings thus point to the critical need, even for EDCs of known effects, to have suitable developmental models to analyze the potential effects of EDCs on human embryonic and postembryonic development.

Of the two BPA concentrations used in this study, the lower concentration (0.1  $\mu\text{M}$ ) closely resembled the estimated BPA exposure level in human infants (see *Materials and Methods*). Both doses inhibited TR $\beta$ -induced transcription in the frog oocyte system. Furthermore, whereas the two doses ranged 100-fold, both inhibited  $T_3$ -induced metamorphosis reproducibly with the higher dose resulting in a more dramatic inhibition. These findings are in strong support that BPA acts as a  $T_3$  antagonist *in vivo*.



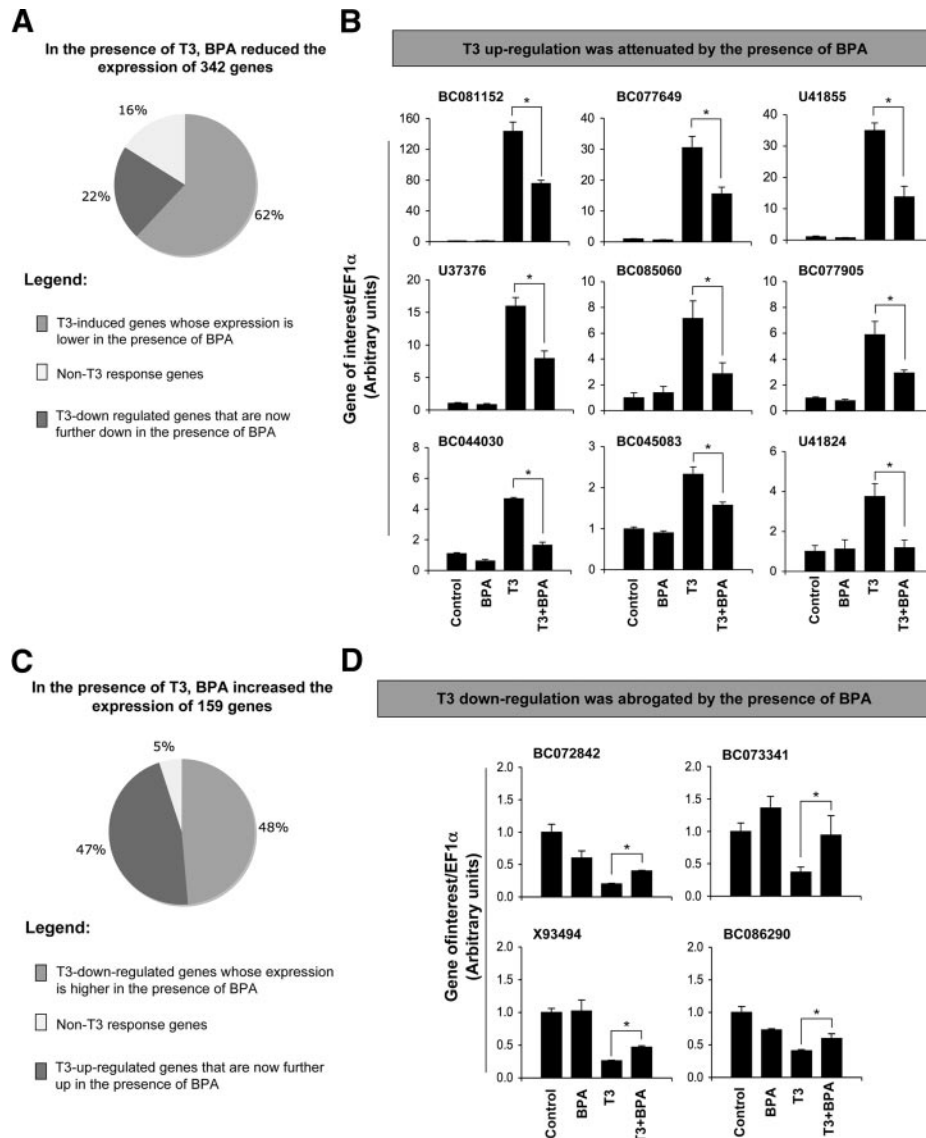

**FIG. 5.** Analysis and verification of genes newly identified by the microarray, whose expression was disrupted by BPA in the presence of T<sub>3</sub>. A, When the gene expression levels in the T<sub>3</sub>-treated group were compared with those in the T<sub>3</sub>+BPA-treated group, expression levels of 342 genes were reduced in the presence of BPA, most of which (60%) were T<sub>3</sub>-induced genes (*i.e.* their expression was up-regulated by T<sub>3</sub> when compared with the control, untreated group). B, Verification of BPA regulation of T<sub>3</sub>-induced genes whose T<sub>3</sub> induction was reduced by BPA. All up-regulated T<sub>3</sub> genes tested by qRT-PCR showed that in the presence of BPA, the expression levels were reduced, confirming the findings from the microarray. C, When the gene expression levels in the T<sub>3</sub>-treated group were compared with those in the T<sub>3</sub>+BPA-treated group, the expression of 159 genes was increased by BPA, of which 48% were genes that were down-regulated by T<sub>3</sub> (when compared with the control, untreated group) and had their down-regulation abrogated by BPA. D, Verification of BPA regulation of T<sub>3</sub>-regulated genes whose down-regulation was abrogated by the presence of BPA. All four T<sub>3</sub>-down-regulated genes tested by qRT-PCR showed that in the presence of BPA, their expression levels were partially reversed as observed by the microarray. For graphical presentation, the qRT-PCR results were expressed as fold induction as compared with the DMSO vehicle controls (control = 1), after normalization with the housekeeping gene, EF1 $\alpha$ . Data are shown as means  $\pm$  SE (n = 3; pooled samples of 10 intestines for each treatment). An asterisk indicates significant differences in mRNA expression levels between T<sub>3</sub> and T<sub>3</sub>+BPA treatment groups ( $P \leq 0.05$ ). GenBank accession numbers are shown above each chart.

Given that high levels of T<sub>3</sub> are critical for human development, especially during the late-embryonic and neonatal period that share many similarities with frog metamorphosis (12–14, 17, 19, 70, 71), our results argue that BPA represents a serious risk to human development through disruption of T<sub>3</sub> signaling pathways.

Using microarray, we found that after 4 d of treatment, the regulation of about 33% of the T<sub>3</sub>-induced genes and 36% of the T<sub>3</sub>-repressed genes were inhibited by BPA. Interestingly, the majority of the most dramatically T<sub>3</sub>-regulated genes were affected in the presence of BPA. Many of these genes are early and/or direct target genes of T<sub>3</sub> and are likely important for metamor-

phosis. For example, ST3 is a direct T<sub>3</sub> target gene and has been shown to be necessary for apoptosis and tissue morphogenesis during intestinal metamorphosis (72, 73). Thus, its inhibition by BPA may contribute to the blockage of intestinal remodeling during metamorphosis by BPA. In addition, most of these BPA-affected T<sub>3</sub>-response genes are ubiquitously regulated by T<sub>3</sub> in different organs as suggested by our metatissue analysis. All these and the fact that gene regulation by T<sub>3</sub>-bound TR is necessary and sufficient for amphibian development (60, 74) strongly argue that the BPA inhibition of these most dramatically T<sub>3</sub>-regulated genes, including ST3, is the underlying cause for the in-

| A  | GenBank  | Gene Name                                   | Other Organs* |
|----|----------|---------------------------------------------|---------------|
| 1  | AF170337 | IM28                                        |               |
| 2  | Z27093   | matrix metalloproteinase 11 (stromelysin-3) | t, l, b       |
| 3  | U41855   | gene 12-lb                                  | t, l, b       |
| 4  | U08407   | arginase 2                                  | t, l, b       |
| 5  | CB565547 | <i>Transcribed locus</i>                    |               |
| 6  | BC077649 | keratin 16                                  | NP            |
| 7  | BC073180 | Riboflavin-binding protein                  | NP            |
| 8  | BC081152 | NFI-X2 transcription factor                 | NP            |
| 9  | BE491416 | <i>Transcribed locus</i>                    |               |
| 10 | U37376   | MAM domain protein                          | t, l, b       |
| 11 | BC093541 | amidohydrolase domain containing 1          | NP            |
| 12 | BG811190 | <i>Transcribed locus</i>                    |               |
| 13 | CF548920 | sorting nexin 4                             |               |
| 14 | CB943692 | <i>Transcribed locus</i>                    | t             |
| 15 | BG022401 | <i>Transcribed locus</i>                    |               |
| 16 | BJ640739 | phosphopantothenoylecysteine decarboxylase  | NP            |
| 17 | BC043864 | PR domain containing 4                      | NP            |
| 18 | BC071004 | sulfotransferase family 3A                  | NP            |
| 19 | CN318237 | Heat shock factor binding protein 1         | NP            |
| 20 | AB075925 | Tiarin                                      | t, l          |
| 21 | CD253165 | <i>Transcribed locus</i>                    |               |
| 22 | BC078565 | Iodotyrosine deiodinase                     | NP            |
| 23 | CF522012 | <i>Transcribed locus</i>                    | NP            |
| 24 | BG162076 | <i>Transcribed locus</i>                    |               |
| 25 | BC085060 | <i>Transcribed locus</i>                    | NP            |
| 26 | BC070671 | solute carrier family 34                    | NP            |
| 27 | CD811210 | <i>Transcribed locus</i>                    |               |
| 28 | BC081272 | calbindin 1                                 | NP            |
| 29 | BC079830 | <i>Transcribed locus</i>                    | NP            |
| 30 | CV079029 | <i>Transcribed locus</i>                    | NP            |
| 31 | BC085209 | <i>Transcribed locus</i>                    | NP            |
| 32 | CB943171 | <i>Transcribed locus</i>                    | t, l, b       |
| 33 | BJ059247 | mex-3 homolog B                             | t, l, b       |
| 34 | U76636   | calbindin D28k                              | t, b          |
| 35 | BI443557 | <i>Transcribed locus</i>                    |               |
| 36 | BC074477 | epithelial membrane protein 1               | NP            |
| 37 | BC088671 | Gene 16                                     | NP            |
| 38 | BC072304 | transglutaminase 2                          | NP            |
| 39 | BC072818 | solute carrier family 41                    | NP            |
| 40 | BC072360 | RAB30, member RAS oncogene family           | NP            |
| 41 | BP727251 | <i>Transcribed locus</i>                    | NP            |
| 42 | BC080096 | sulfotransferase family 1D, member 1        | NP            |
| 43 | BC054947 | Matrix metalloproteinase 2                  | t, l          |
| 44 | BC054225 | heat shock 22kDa protein 8                  |               |
| 45 | BC072220 | polyamine oxidase                           | NP            |
| 46 | BP687505 | <i>Transcribed locus</i>                    | NP            |
| 47 | BC087471 | High temperature required A1                | NP            |
| 48 | CD300904 | <i>Transcribed locus</i>                    | t, l, b       |
| 49 | BC044030 | Tubulin beta-2 chain                        | b             |
| 50 | BC077870 | Matrix metalloproteinase 24                 | NP            |

| B  | GenBank  | Gene Name                                          | Other Organs* |
|----|----------|----------------------------------------------------|---------------|
| 1  | BJ637545 | <i>Transcribed locus</i>                           | NP            |
| 2  | AW199587 | <i>Transcribed locus</i>                           |               |
| 3  | CB560198 | mucin 2                                            |               |
| 4  | BC081224 | thioredoxin reductase 1                            | NP            |
| 5  | BC056128 | <i>C. elegans</i> WNT family member precursor      | t             |
| 6  | AW765313 | <i>Transcribed locus</i>                           |               |
| 7  | BC072842 | tripartite motif-containing 2                      | NP            |
| 8  | BC081057 | solute carrier family 22                           | NP            |
| 9  | BC076843 | natriuretic peptide precursor type C               | NP            |
| 10 | BC072977 | platelet-activating factor acetylhydrolase 2       | NP            |
| 11 | X93494   | glucokinase                                        | t, l          |
| 12 | BJ062152 | autism susceptibility candidate 2                  | NP            |
| 13 | BC086297 | uncoupling protein 2                               | NP            |
| 14 | BC083003 | alcohol dehydrogenase 1                            | NP            |
| 15 | CB756001 | cytosolic beta-glucosidase                         |               |
| 16 | AW645021 | sulfotransferase family                            | t, l, b       |
| 17 | BC082652 | <i>Transcribed locus</i>                           | NP            |
| 18 | BC078533 | carboxypeptidase O                                 | NP            |
| 19 | BC048021 | Enzymatic glycosylation-regulating gene            | l             |
| 20 | BC081049 | solute carrier family 6                            | NP            |
| 21 | BG022969 | <i>Transcribed locus</i>                           |               |
| 22 | BC047973 | L-arginine:glycine amidinotransferase              | t, b          |
| 23 | BQ734819 | ficolin 2 isoform a precursor                      | l             |
| 24 | BC088918 | GRAM domain containing 3                           | NP            |
| 25 | BC085208 | proprotein convertase subtilisin                   | NP            |
| 26 | BC042305 | <i>Transcribed locus</i>                           |               |
| 27 | BC079680 | serine hydroxymethyltransferase 2                  | NP            |
| 28 | BC087377 | <i>Transcribed locus</i>                           | NP            |
| 29 | BC081241 | transmembrane protein 100                          | NP            |
| 30 | AF146087 | Enhancer of split related epidermal protein-6      | l             |
| 31 | BC077065 | melanoregulin                                      | NP            |
| 32 | AW200620 | <i>Transcribed locus</i>                           | l             |
| 33 | BX854738 | DEP domain containing 4                            | l             |
| 34 | CD302379 | sialyltransferase 4A                               | NP            |
| 35 | AF231035 | Natriuretic peptide receptor type C                |               |
| 36 | BC072225 | breast cancer antiestrogen resistance 3            | NP            |
| 37 | BC086290 | Neurula-specific ferredoxin reductase-like protein | NP            |
| 38 | BC082653 | cystathionase                                      | NP            |
| 39 | BC074210 | alcohol dehydrogenase 1                            | NP            |
| 40 | BC086270 | glucosaminyl (N-acetyl) transferase 3, mucin type  | NP            |
| 41 | BX850255 | <i>Transcribed locus</i>                           | NP            |
| 42 | BI312892 | <i>Transcribed locus</i>                           |               |
| 43 | BC081141 | retinol dehydrogenase 5                            | NP            |
| 44 | CB561838 | <i>Transcribed locus</i>                           | NP            |
| 45 | AW646661 | <i>Transcribed locus</i>                           | NP            |
| 46 | CD327911 | <i>Transcribed locus</i>                           | t, l, b       |
| 47 | BC059301 | Potassium inwardly-rectifying channel              | t, l, b       |
| 48 | AF353715 | Kruppel-like transcription factor neptune          | t, l          |
| 49 | BF614568 | <i>Transcribed locus</i>                           |               |
| 50 | BC077917 | prostaglandin reductase 1                          | NP            |

**FIG. 6.** BPA inhibits the genes most significantly regulated by  $T_3$ . A, The expression of most of the top 50 significantly  $T_3$ -up-regulated genes in the intestine is reduced by BPA. The genes in *shade* are attenuated by BPA. B, Most of the top 50 significantly  $T_3$ -down-regulated genes in the intestine have their  $T_3$ -dependent repression reduced by the presence of BPA. The genes in *shade* are abrogated by BPA. \*, The gene is also significantly regulated by  $T_3$  in the tail (t), limb (l), and brain (b), respectively. NP, Gene not present in the earlier cDNA array used for the analysis of the organs t, l, and b (64). Blanks under the other organs indicate genes are not significantly regulated by  $T_3$  in t, l, and b.

hibition of metamorphosis by BPA. The failure to observe significant effects by BPA on many less dramatically regulated  $T_3$ -response genes is presumably due to the difficulty to detect the relatively small changes in their expression caused by BPA with microarray analysis.

Whereas one may expect that BPA inhibit metamorphosis by disrupting  $T_3$  signaling, it is surprising that the vast majority of the genes affected by BPA are  $T_3$ -response genes. Of the BPA down-regulated genes in the presence of  $T_3$ , 60% were  $T_3$ -induced genes whose activation by  $T_3$  was now reduced/eliminated by BPA. Conversely, about 50% of the BPA up-regulated genes in the presence of  $T_3$  were  $T_3$ -down-regulated genes whose down-regulation by  $T_3$  was reduced/eliminated by BPA. Only about 20% of the BPA-regulated genes in the presence of  $T_3$  were completely independent of  $T_3$ -signaling process. Our studies thus indicate that developmental context has a major role in determining the pathways by which BPA interacts *in vivo*. In this regard, it is worth noting that  $T_3$ , but not other hormones, is the causative agent of amphibian metamorphosis and hence intestinal remodeling (15). Whereas it is possible that potential cross talks between TR and estrogen receptor (ER)-signaling pathways (42, 43, 75) may allow BPA to affect  $T_3$ -pathway through ER, the fact that most of the BPA regulated genes are  $T_3$ -response genes argue against this. In addition, as discussed above, most of

the dramatically  $T_3$ -regulated genes are affected by BPA, suggesting that BPA is likely targeting TRs directly during metamorphosis. Currently there are no data on the expression profiles of estrogens and ER $\alpha$  in the intestine during development, although ER $\alpha$  mRNA could be detected in whole-body premetamorphic tadpoles and were up-regulated after prolonged  $T_3$  treatment in the liver (76–78). Our microarray analysis showed no regulation by BPA in the expression of two known estrogen-response genes, ER $\alpha$  (AY310905, L20736) and steroid-5- $\alpha$ -reductase (BQ732157) (76, 79), from BPA or combined  $T_3$ +BPA treatments. Furthermore, treatment with  $T_3$  alone did not change their gene expression, suggesting that there does not appear to be any cross-regulation between estrogens and  $T_3$  in the metamorphic intestine. It is possible that the lack of significant ER in the tadpole intestine may be the underlying cause for the observed dominant effects of BPA on  $T_3$ -signaling process during metamorphosis in this study.

In summary, our findings demonstrate that BPA, which is one of the most prevalent chemicals for daily use, suppresses transcriptional activity of ligand-bound TR during vertebrate development. Moreover, genome-wide analysis leads to two major conclusions. First, the inhibitory effect of BPA on metamorphosis is due to the inhibition of the  $T_3$  pathway. Endocrine disruptor studies normally focus on the regulation of one or a few genes; the pathways involving these genes may or may not have any



significant contribution to the biological effects of the disruptor. This argues for genome-wide molecular analysis of the effect of endocrine disruptors. Second, the major effect of BPA in developing tadpoles is on the T<sub>3</sub>, but not estrogenic pathways, which would be expected based on previous BPA studies *in vitro* and in adult animals, although estrogenic pathways are also likely to be affected by BPA. This argues that the effects of an endocrine disruptor are tissue and developmental stage dependent and that *in vivo* studies coupled with genome-wide molecular gene regulation analysis are needed to assess the biological effects of an endocrine disruptor and the underlying molecular mechanism. Our findings further demonstrate the unique advantages of combining morphological analysis with genome-wide gene expression studies in amphibians to determine the molecular pathways that underlie a developmental consequence of an EDC, especially for those affecting T<sub>3</sub> pathways. The diverse array of EDCs that may disrupt T<sub>3</sub> levels and the potential for concurrent exposure to many of these compounds make it imperative to use *in vivo* developmental models to appreciate the effects of EDCs on vertebrate development. This will help to ensure that important environmental health and developmental consequences of EDC exposure are not overlooked.

## Acknowledgments

Address all correspondence and requests for reprints to: Yun-Bo Shi, Building 18 T, Room 106, Program on Cell Regulation and Metabolism, National Institute of Child Health and Human Development, National Institutes of Health, Bethesda, Maryland 20892. E-mail: shi@helix.nih.gov.

This work was supported in part by the Intramural Research Program, National Institute of Child Health and Human Development, National Institutes of Health.

Disclosure Summary: The authors have nothing to disclose.

## References

- Guillette Jr LJ 2006 Endocrine disrupting contaminants—beyond the dogma. *Environ Health Perspect* 114:9–12
- Boas M, Feldt-Rasmussen U, Skakkebaek NE, Main KM 2006 Environmental chemicals and thyroid function. *Eur J Endocrinol* 154:599–611
- Crews D, McLachlan JA 2006 Epigenetics, evolution, endocrine disruption, health, and disease. *Endocrinology* 147:S4–S10
- Maffini MV, Rubin BS, Sonnenschein C, Soto AM 2006 Endocrine disruptors and reproductive health: the case of bisphenol-A. *Mol Cell Endocrinol* 254–255:178–186
- Wolff MS, Weston A 1997 Breast cancer risk and environmental exposures. *Environ Health Perspect* 105:891–896
- Skakkebaek NE, Rajpert-De Meyts E, Jørgensen N, Carlsen E, Peterson PM, Giwercman A, Andersen A-G, Jensen TK, Andersson A-M, Müller J 1998 Germ cell cancer and disorders of spermatogenesis: an environmental connection? *APMIS* 106:3–12
- Jensen TK, Toppari J, Keiding N, Skakkebaek NE 1995 Do environmental estrogens contribute to the decline in male reproductive health? *Clin Chem* 41:1896–1901
- Ouellet M, Bonin J, Rodrigue J, DesGranges JL, Lair S 1997 Hindlimb deformities (ectromelia, ectrodactyly) in free-living anurans from agricultural habitats. *J Wildl Dis* 33:95–104
- Houlahan JE, Findlay CS, Schmidt BR, Meyer AH, Kuzmin SL 2000 Quantitative evidence for global amphibian population declines. *Nature* 404:752–755
- Hayes TB, Case P, Chui S, Chung D, Haeffele C, Haston K, Lee M, Mai VP, Marjuoa Y, Parker J, Tsui M 2006 Pesticide mixtures, endocrine disruption, and amphibian declines: are we understanding the impact? *Environ Health Perspect* 114:40–50
- Hayes T, Haston K, Tsui M, Hoang A, Haeffele C, Vonk A 2003 Atrazine-induced hermaphroditism at 0.1 ppb in American leopard frogs (*Rana pipiens*): laboratory and field evidence. *Environ Health Perspect* 111:568–575
- Lazar MA 1993 Thyroid hormone receptors: multiple forms, multiple possibilities. *Endocr Rev* 14:184–193
- Yen PM 2001 Physiological and molecular basis of thyroid hormone action. *Physiol Rev* 81:1097–1142
- Tata JR 1993 Gene expression during metamorphosis: an ideal model for post-embryonic development. *Bioessays* 15:239–248
- Shi Y-B 1999 Amphibian metamorphosis: from morphology to molecular biology. New York: John Wiley, Sons, Inc.
- Atkinson BG 1994 Metamorphosis: model systems for studying gene expression in postembryonic development. *Dev Genet* 15:313–319
- Hetzl BS 1989 The story of iodine deficiency: an international challenge in nutrition. Oxford, UK: Oxford University Press
- Denver RJ 1996 Neuroendocrine control of amphibian metamorphosis. In: Gilbert LI, Tata JR, Atkinson BG, eds. *Metamorphosis postembryonic reprogramming of gene expression in amphibian and insect cells*. San Diego: Academic Press; 433–464
- Howdeshell KL 2002 A model of the development of the brain as a construct of the thyroid system. *Environ Health Perspect* 110:337–348
- Crump D, Werry K, Veldhoen N, Van Aggelen G, Helbing CC 2002 Exposure to the herbicide acetochlor alters thyroid hormone-dependent gene expression and metamorphosis in *Xenopus laevis*. *Environ Health Perspect* 110:1199–1205
- Colborn T 2002 Clues from wildlife to create and assay for thyroid system disruption. *Environ Health Perspect* 110:363–367
- Zoeller RT 2007 Environmental chemicals impacting the thyroid: targets and consequences. *Thyroid* 17:811–817
- Mangelsdorf DJ, Thummel C, Beato M, Herrlich P, Schütz G, Umesono K, Blumberg B, Kastner P, Mark M, Chambon P, Evans RM 1995 The nuclear receptor superfamily: the second decade. *Cell* 83:835–839
- Tsai MJ, O'Malley BW 1994 Molecular mechanisms of action of steroid/thyroid receptor superfamily members. *Ann Rev Biochem* 63:451–486
- Ito M, Roeder RG 2001 The TRAP/SMCC/Mediator complex and thyroid hormone receptor function. *Trends Endocrinol Metab* 12:127–134
- Rachez C, Freedman LP 2000 Mechanisms of gene regulation by vitamin D(3) receptor: a network of coactivator interactions. *Gene* 246:9–21
- Zhang J, Lazar MA 2000 The mechanism of action of thyroid hormones. *Annu Rev Physiol* 62:439–466
- Burke LJ, Banihmad A 2000 Co-repressors 2000. *FASEB J* 14:1876–1888
- Jones PL, Shi Y-B 2003 N-CoR-HDAC corepressor complexes: roles in transcriptional regulation by nuclear hormone receptors. In: Workman JL, ed. *Current topics in microbiology and immunology: protein complexes that modify chromatin*. Berlin: Springer-Verlag; 237–268
- McKenna NJ, O'Malley BW 2001 Nuclear receptors, coregulators, ligands, and selective receptor modulators: making sense of the patchwork quilt. *Ann NY Acad Sci* 949:3–5
- McKenna NJ, Freedman LP 2001 Mediator complexes and transcription. *Curr Opin Cell Biol* 13:274–280
- McKinney JD, Waller CL 1998 Molecular determinants of hormone mimicry: halogenated aromatic hydrocarbon environmental agents. *J Toxicol Environ Health B Crit Rev* 1:27–58
- Crain DA, Eriksen M, Iguchi T, Jobling S, Laufer H, LeBlanc GA, Guillette Jr LJ 2007 An ecological assessment of bisphenol-A: evidence from comparative biology. *Reprod Toxicol* 24:225–239
- Calafat AM, Kuklennyk Z, Reidy JA, Caudill SP, Ekong J, Needham LL 2005 Urinary concentrations of bisphenol A and 4-nonylphenol in a human reference population. *Environ Health Perspect* 113:391–395
- Schönfelder G, Wittfoht W, Hopp H, Talsness CE, Paul M, Chahoud I 2002 Parent bisphenol A accumulation in the human maternal-fetal-placental unit. *Environ Health Perspect* 110:A703–A707
- Yamamoto H, Yokouchi Y, Otsuki A, Itoh H 2001 Depth profiles of volatile halogenated hydrocarbons in seawater in the Bay of Bengal. *Chemosphere* 45:371–377
- Reporter CM 1999 ChemExpo chemical profile: bisphenol A. New York: Schnell Publishing Co.
- Lewis JB, Rueggeberg FA, Lapp CA, Ergle JW, Schuster GS 1999 Identification and characterization of estrogen-like components in commercial resin-based dental restorative materials. *Clin Oral Invest* 3:107–113
- Staples CA, Dorn PB, Klecka GM, O'Block ST, Harris LR 1998 A review of the environmental fate, effects, and exposures of bisphenol A. *Chemosphere* 36:2149–2173
- Howe SR, Borodinsky L, Lyon RS 1998 Potential exposure to bisphenol A from food-contact use of epoxy coated cans. *J Coat Technol* 70:69–74
- vom Saal FS, Hughes C 2005 An extensive new literature concerning low-dose

- effects of bisphenol A shows the need for a new risk assessment. *Environ Health Perspect* 113:926–933
42. Hogan NS, Duarte P, Wade MG, Lean DR, Trudeau VL 2008 Estrogenic exposure affects metamorphosis and alters sex ratios in the northern leopard frog (*Rana pipiens*): identifying critically vulnerable periods of development. *Gen Comp Endocrinol* 156:515–523
  43. Hogan NS, Crump KL, Duarte P, Lean DR, Trudeau VL 2007 Hormone cross-regulation in the tadpole brain: developmental expression profiles and effect of T<sub>3</sub> exposure on thyroid hormone- and estrogen-responsive gene in *Rana pipiens*. *Gen Comp Endocrinol* 154:5–15
  44. Moriyama K, Tagami T, Akamizu T, Usui T, Saijo M, Kanamoto N, Hataya Y, Shimatsu A, Kuzuya H, Nakao K 2002 Thyroid hormone action is disrupted by bisphenol A as an antagonist. *J Clin Endocrinol Metab* 87:5185–5190
  45. Seiva C, Nakahara J, Komiya T, Katsu Y, Iguchi T, Asou H 2004 Bisphenol A exerts thyroid-hormone-like effects on mouse oligodendrocyte precursor cells. *Neuroendocrinology* 80:21–30
  46. Zoeller RT, Bansal R, Parris C 2005 Bisphenol-A, an environmental contaminant that acts as a thyroid hormone receptor antagonist *in vitro*, increases serum thyroxine, and alters RC3/neurogranin expression in the developing rat brain. *Endocrinology* 146:607–612
  47. Gray KM, Janssens PA 1990 Gonadal hormones inhibit the induction of metamorphosis by thyroid hormones in *Xenopus laevis* tadpoles *in vivo*, but not *in vitro*. *Gen Comp Endocrinol* 77:202–211
  48. Richards CM, Nace GW 1978 Gynogenetic and hormonal sex reversal used in tests of the XX-XY hypothesis of sex determination in *Rana pipiens*. *Growth* 42:319–331
  49. Hayes TB 1997 Steroids as potential modulators of thyroid hormone activity in anuran metamorphosis. *Am Zool* 37:185–194
  50. Iwamuro S, Sakakibara M, Terao M, Ozawa A, Kurobe C, Shigeura T, Kato M, Kikuyama S 2003 Teratogenic and anti-metamorphic effects of bisphenol A on embryonic and larval *Xenopus laevis*. *Gen Comp Endocrinol* 133:189–198
  51. Iwamuro S, Yamada M, Kato M, Kikuyama S 2006 Effects of bisphenol A on thyroid hormone-dependent up-regulation of thyroid hormone receptor  $\alpha$  and  $\beta$  and down-regulation of retinoid X receptor  $\gamma$  in *Xenopus* tail culture. *Life Sci* 279:2165–2171
  52. Goto Y, Kitanura S, Kashiwagi K, Oofusa K, Tooi O, Yoshizato K, Sato J, Ohta S, Kashiwagi A 2006 Suppression of amphibian metamorphosis by bisphenol A and related chemical substances. *J Health Sci* 52:160–168
  53. Fini JB, Le Mevel S, Turque N, Palmier K, Zalko D, Cravedi JP, Demeneix BA 2007 An *in vivo* multiwell-based fluorescent screen for monitoring vertebrate thyroid hormone disruption. *Environ Sci Technol* 41:5908–5914
  54. Kaneko M, Okada R, Yamamoto K, Nakamura M, Mosconi G, Polzonetti-Magni AM, Kikuyama S 2008 Bisphenol A acts differently from and independently of thyroid hormone in suppressing thyrotropin release from the bullfrog pituitary. *Gen Comp Endocrinol* 155:574–580
  55. Kloas W, Lutz I, Einspanier R 1999 Amphibians as a model to study endocrine disruptors: II. Estrogenic activity of environmental chemicals *in vitro* and *in vivo*. *Sci Total Environ* 225:59–68
  56. Levy G, Lutz I, Krüger A, Kloas W 2004 Bisphenol A induces feminization in *Xenopus laevis* tadpoles. *Environ Res* 94:102–111
  57. Pickford DB, Hetheridge MJ, Caunter JE, Hall AT, Hutchinson TH 2003 Assessing chronic toxicity of bisphenol A to larvae of the African clawed frog (*Xenopus laevis*) in a flow-through exposure system. *Chemosphere* 53:223–235
  58. Ishizuya-Oka A, Shi YB 2007 Regulation of adult intestinal epithelial stem cell development by thyroid hormone during *Xenopus laevis* metamorphosis. *Dev Dyn* 236:3358–3368
  59. Shi YB, Ishizuya-Oka A 1996 Biphasic intestinal development in amphibians: embryogenesis and remodeling during metamorphosis. *Curr Top Dev Biol* 32:205–235
  60. Buchholz DR, Paul BD, Fu L, Shi YB 2006 Molecular and developmental analyses of thyroid hormone receptor function in *Xenopus laevis*, the African clawed frog. *Gen Comp Endocrinol* 145:1–19
  61. Wong J, Shi YB 1995 Coordinated regulation of and transcriptional activation by *Xenopus* thyroid hormone and retinoid X receptors. *J Biol Chem* 270:18479–18483
  62. Amano T, Leu K, Yoshizato K, Shi Y-B 2002 Thyroid hormone regulation of a transcriptional coactivator in *Xenopus laevis*: implication for a role in postembryonic tissue remodeling. *Dev Dyn* 223:526–535
  63. Buchholz DR, Heimeier RA, Das B, Washington T, Shi Y-B 2007 Pairing morphology with gene expression in thyroid hormone-induced intestinal remodeling and identification of a core set of TH-induced genes across tadpole tissues. *Dev Biol* 303:576–590
  64. Das B, Cai L, Carter MG, Piao YL, Sharov AA, Ko MS, Brown DD 2006 Gene expression changes at metamorphosis induced by thyroid hormone in *Xenopus laevis* tadpoles. *Dev Biol* 291:342–355
  65. Benjamini Y, Hochberg Y 1995 Controlling the false discovery rate: a practical and powerful approach to multiple testing. *J Roy Stat Soc Ser B* 57:289–300
  66. Hamatani T, Carter MG, Sharov AA, Ko MS 2004 Dynamics of global gene expression changes during mouse preimplantation development. *Dev Cell* 6:117–131
  67. Sharov AA, Dudekula DB, Ko MS 2005 A web-based tool for principal component and significance analysis of microarray data. *Bioinformatics* 21:2548–2549
  68. Tomita A, Buchholz DR, Shi YB 2004 Recruitment of N-CoR/SMRT-TBLR1 corepressor complex by unliganded thyroid hormone receptor for gene repression during frog development. *Mol Cell Biol* 24:3337–3346
  69. Schreiber AM, Cai L, Brown DD 2005 Remodeling of the intestine during metamorphosis of *Xenopus laevis*. *Proc Natl Acad Sci USA* 102:3720–3725
  70. Morreale de Escobar G 2001 The role of thyroid hormone in fetal neurodevelopment. *J Pediatr Endocrinol Metab* 14:1453–1462
  71. Morreale de Escobar G, Obregon MJ, Escobar del Rey F 2004 Role of thyroid hormone during early brain development. *Eur J Endocrinol* 151:U25–U37
  72. Fu L, Ishizuya-Oka A, Buchholz DR, Amano T, Matsuda H, Shi YB 2005 A causative role of stromelysin-3 in extracellular matrix remodeling and epithelial apoptosis during intestinal metamorphosis in *Xenopus laevis*. *J Biol Chem* 280:27856–27865
  73. Ishizuya-Oka A, Li Q, Amano T, Damjanovski S, Ueda S, Shi YB 2000 Requirement for matrix metalloproteinase stromelysin-3 in cell migration and apoptosis during tissue remodeling in *Xenopus laevis*. *J Cell Biol* 150:1177–1188
  74. Havis E, Le Mevel S, Dubois GM, Shi DL, Scanlan TS, Demeneix BA, Sachs LM 2006 Unliganded thyroid hormone receptor is essential for *Xenopus laevis* eye development. *EMBO J* 25:4943–4951
  75. Trudeau VL, Turque N, Le Mével S, Alliot C, Gallant N, Coen L, Pakdel F, Demeneix B 2005 Assessment of estrogenic endocrine-disrupting chemical actions in the brain using *in vivo* somatic gene transfer. *Environ Health Perspect* 113:329–334
  76. Bögi C, Levy G, Lutz I, Kloas W 2002 Functional genomics and sexual differentiation in amphibians. *Comp Biochem Physiol B Biochem Mol Biol* 133:559–570
  77. Tata JR, Baker BS, Machuca I, Rabelo EM, Yamauchi K 1993 Autoinduction of nuclear receptor genes and its significance. *J Steroid Biochem Mol Biol* 46:105–119
  78. Rabelo EM, Tata JR 1993 Thyroid hormone potentiates estrogen activation of vitellogenin genes and autoinduction of estrogen receptor in adult *Xenopus* hepatocytes. *Mol Cell Endocrinol* 96:37–44
  79. Urbatzka R, Lutz I, Kloas W 2007 Aromatase, steroid-5 $\alpha$ -reductase type 1 and type 2 mRNA expression in gonads and in brain of *Xenopus laevis* during ontogeny. *Gen Comp Endocrinol* 153:280–288
